# Supplementary material
Source: PubMed Central journal article supplement (PMC2567214)
Supplement: 0804105105_0804105105SI.pdf [file 0804105105_0804105105SI.pdf]

# Supporting Information

Rabinovich *et al.* 10.1073/pnas.0804105105

SI Text

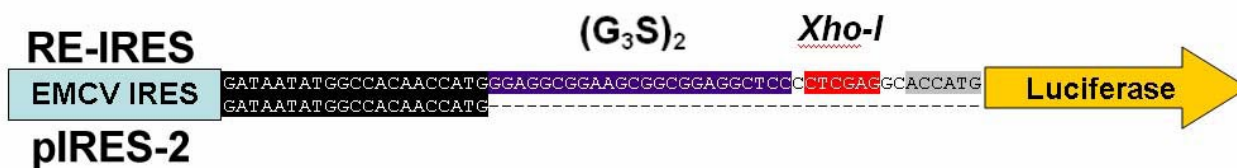

Fig. S1. Construction of the re-engineered (RE-IRES) EMCV IRES. pIRES-2 (Clontech) was modified to include a (G<sub>3</sub>S)<sub>2</sub> linker (blue) and a *Xho-I* site (red) in frame with the native EMCV preferred transcriptional start site (immediately 5' of the (G<sub>3</sub>S)<sub>2</sub> linker).

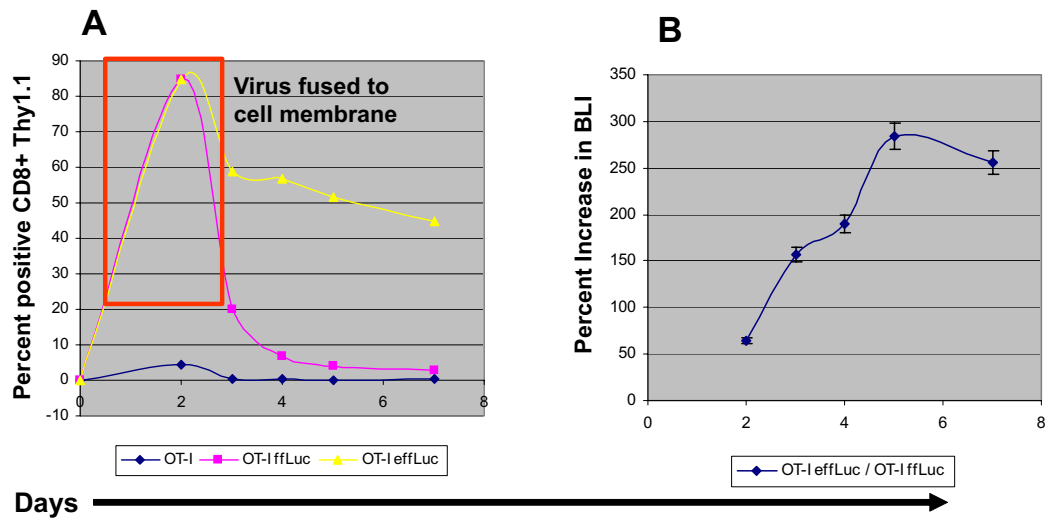

**Fig. S2.** Kinetics of Thy1.1 expression and firefly luciferase activity. OT-I T cells were transduced with v-ffLuc, v-effLuc or mock-transduced (as indicated) 24 h after activation. Thy1.1 expression (A) and bioluminescent activity (B) were measured for 7 days via flow cytometry and the *in vitro* bioluminescent assay (described in *Methods*), respectively. Early Thy1.1 expression (days 2–3) is caused by fusion of virus to target cell plasma membranes (pseudotransduction) and not true expression. Bioluminescent activity is expressed as the percentage difference of luminescence recorded from  $1 \times 10^5$  effLuc-transduced OT-I T cells versus  $1 \times 10^5$  ffLuc-transduced OT-I T cells.

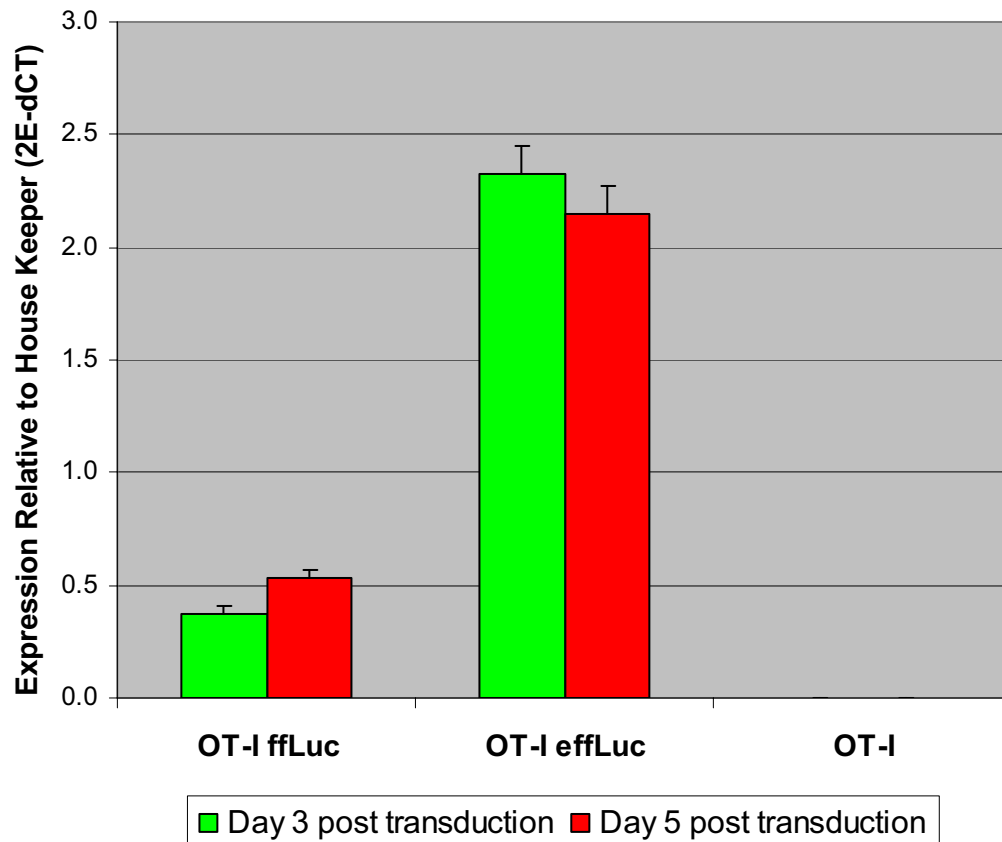

**Fig. S3.** Assessment of viral integration in OT-I T cells transduced with v-ffLuc or v-effLuc. OT-I T cells were transduced with v-ffLuc or v-effLuc (or mock-transduced; as indicated) and total DNA isolated via DNeasy (Qiagen) 3 (green bars) and 5 (red bars) days after transduction. Taqman quantitative PCR was performed to assess the degree of ffLuc and effLuc integration. For ffLuc the 5' primer, 3' primer and probe were TTTGAAGAAGAGCTGTTTCTGAGGAG, CACCAGCAGCGCACTTT and FAM-CCTTCAGGATTACAAGATTC, respectively. For effLuc the 5' primer, 3' primer and probe was TGCAACAAGGCCATGAAGAGATA, AAATACTCGGCGTAGGTGATGTC and CACCATCGCCTTCACCG, respectively. The house keeping gene was mouse  $\beta$ -actin (VIC; Applied Biosystems).

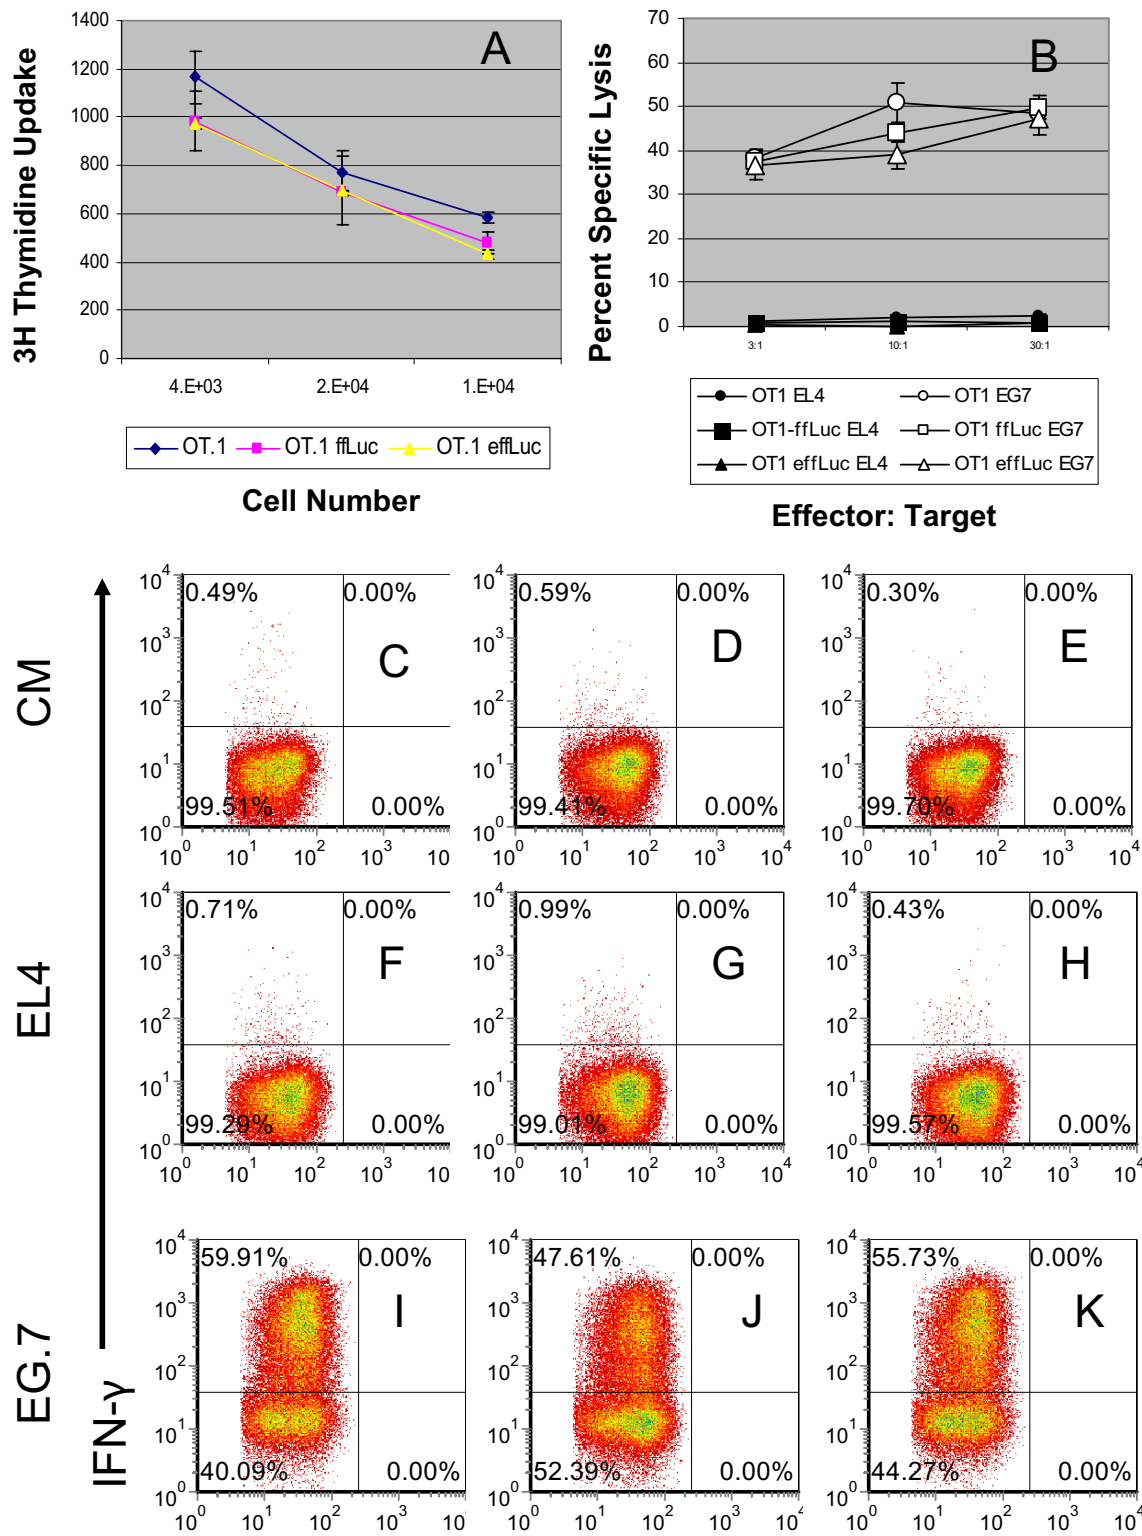

**Fig. S4.** *In vitro* immunological assessment of OT-I T cells transduced with v-ffLuc versus v-effLuc. OT-I T cells were transduced with v-ffLuc or v-effLuc (as indicated), sorted for Thy1.1<sup>+</sup> cells 4 days later and subjected to functional assays 48 h later. These included proliferation (<sup>3</sup>H Thymidine uptake) (A), specific cytotoxicity (chromium release assay using EL4 (negative control) and EG.7 (Ova-expressing) target cells and intracellular IFN- $\gamma$  production after coculture (4 h) with EL4 or EG.7 (B). Note that EG.7 but not EL4 induced similar IFN- $\gamma$  production in OT-I control T cells, ffLuc- and effLuc-expressing T cells. None of the functional assays demonstrated any significant differences between ffLuc-, effLuc-, and mock-transduced OT-I T cells.

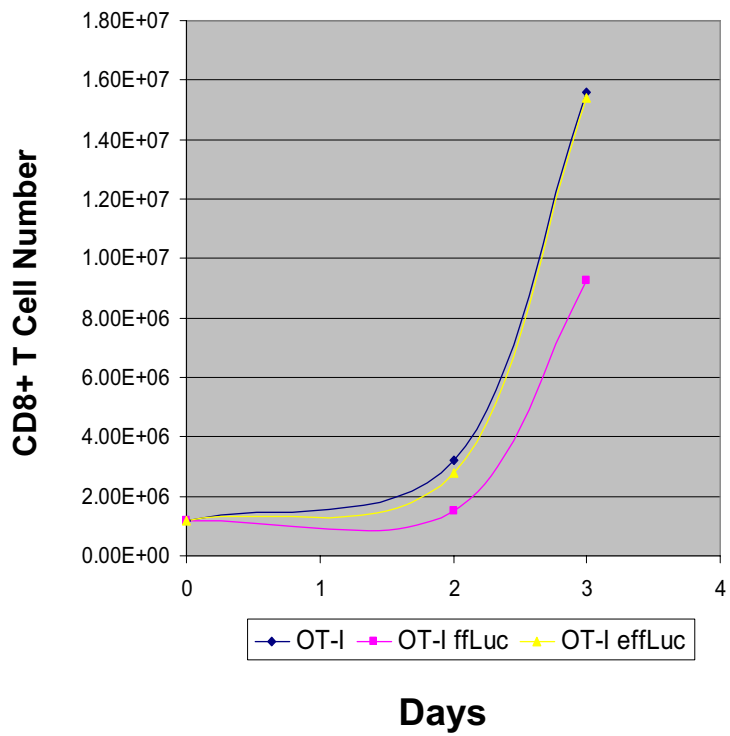

**Fig. S5.** Proliferation of v-ffLuc- and v-effLuc-transduced OT.1 T cells. OT-I T cells were transduced with v-ffLuc, v-effLuc or mock-transduced (as indicated) 24 h after activation and assessed for cell numbers. The first 3 days are shown.

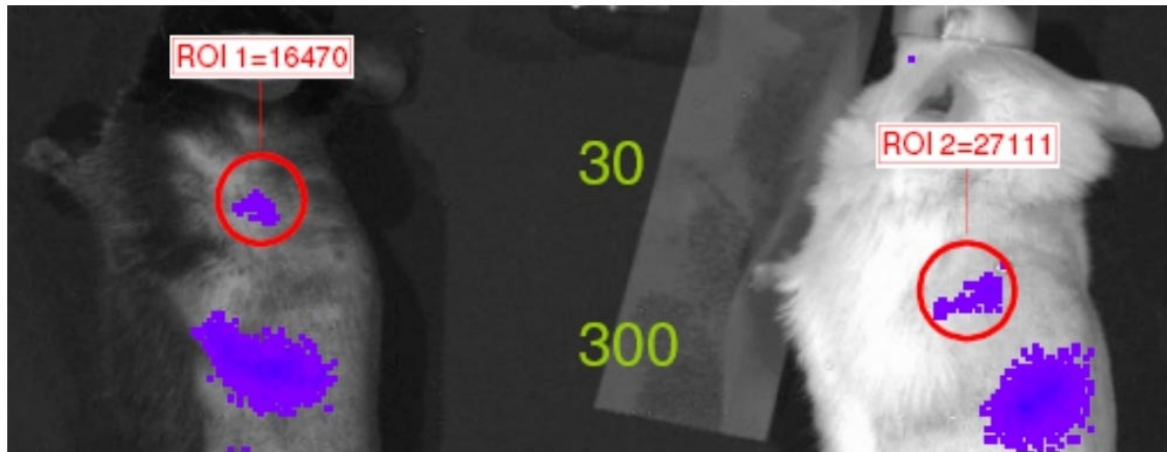

**Fig. S6.** Difference in photon flux transmission between black wild-type and albino C57BL/6 mice. Wild type C57BL/6 mice (*Left*) or albino C57BL/6 mice (*Right*) were injected s.c. with 30 or 300 effLuc-expressing T cells and photon flux measured.

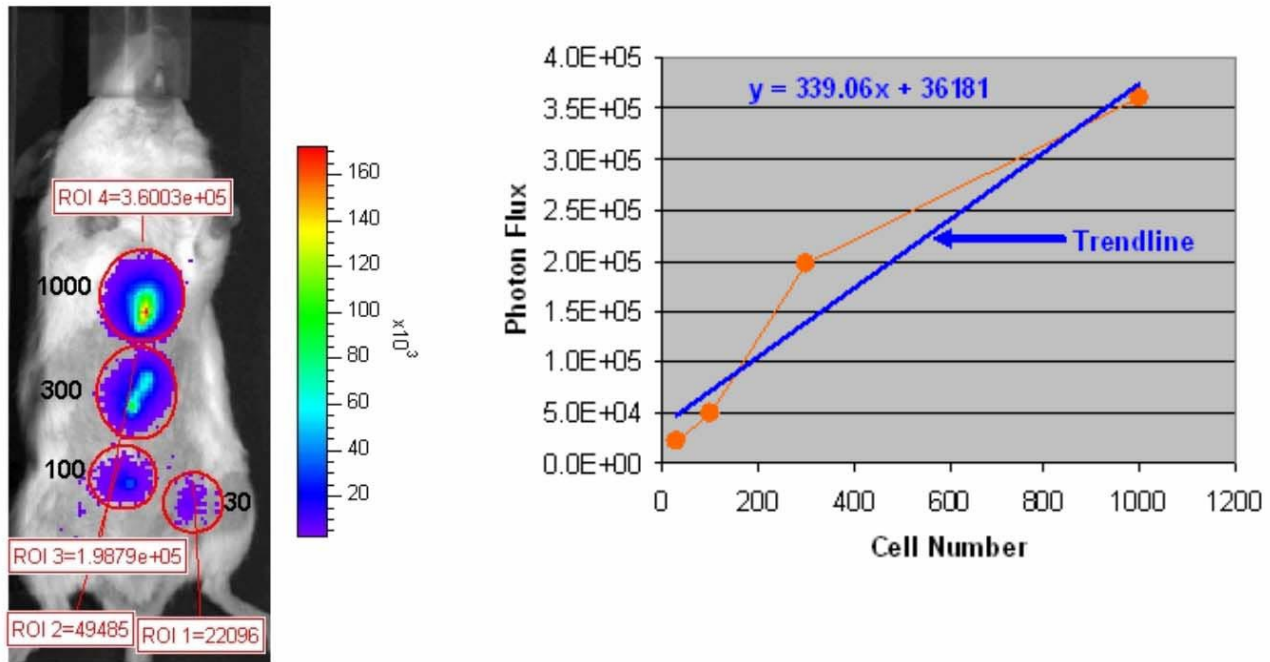

**Fig. S7.** Construction of standard curve to back calculate effLuc-expressing mouse T cells in s.c. tissue. OT.1 T cells were transduced with v-effLuc and sorted for Thy1.1+ cells, and a standard curve was generated for each experiment via s.c. injection of the ventral or dorsal skin (depending on experiment, ventral shown). The same litter of C57BL/6 albino mice were used per experiment. Here the litter was used for the Ova vaccination experiment shown in Fig. 3. T cells were injected at limiting dilution from 1,000 to 30 cells, as indicated and the photon flux measured. A standard curve of photon flux (y axis) versus number of cells injected (x axis) was generated, and a trend line and equation were calculated. The equation was used to back calculate the number of OT.1 T cells migrating to the vaccination site (x) based on the measured photon flux (y).

**A Intra-tumor**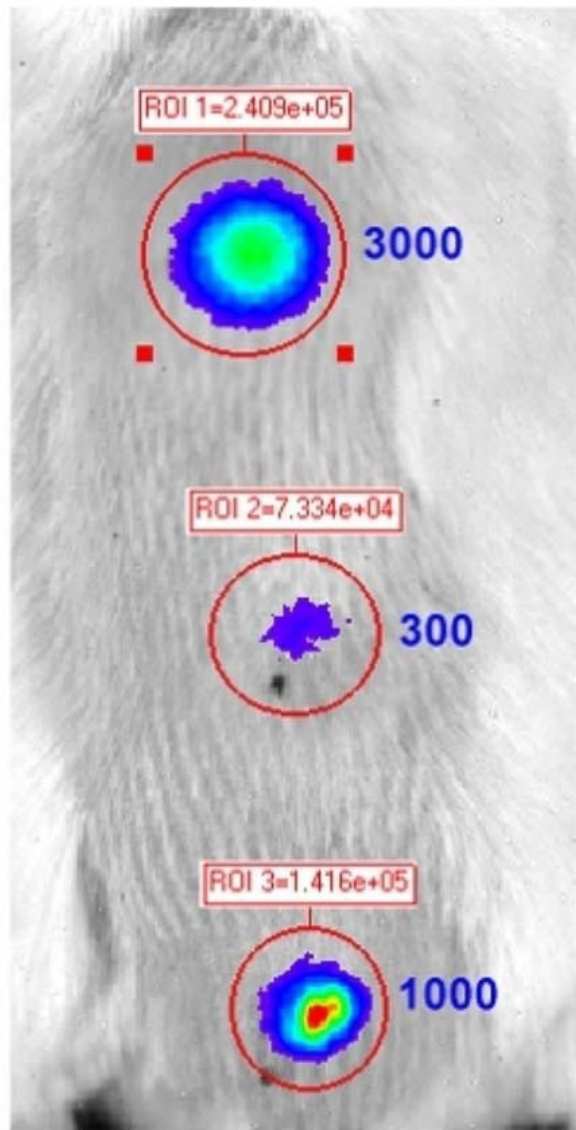**B SC**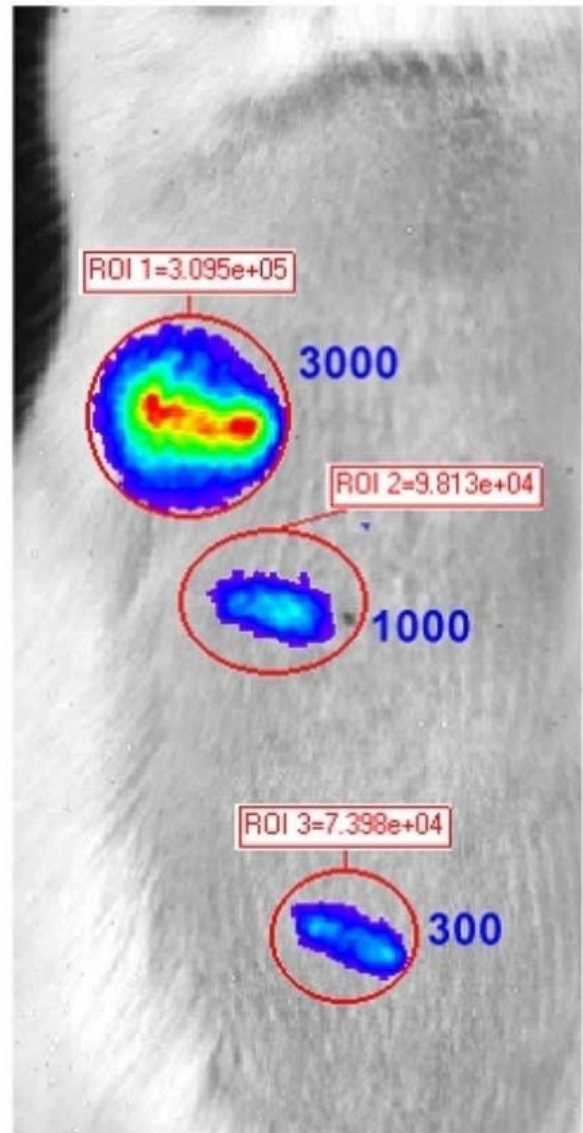**Dorsal Skin**

**Fig. S8.** Comparison of light emission of effLuc T cells injected via intra-tumor or s.c. injection. effLuc T cells were injected into the tumors of day 7 established EL4 tumors (A) or s.c. (B) at the indicated cell numbers. Bioluminescence is indicated as photons per second per ROI.



**Table S1. Comparison of ffLuc and effLuc expression in cell lines representative of multiple mouse and human tissues**

| Tissue        | Origin                    | effLuc (p/s/c) | ffLuc (p/s/c) | Fold difference |             |
|---------------|---------------------------|----------------|---------------|-----------------|-------------|
|               |                           |                |               | Intensity       | Sensitivity |
| Mouse         |                           |                |               |                 |             |
| Mouse T cells | OT-I                      | 2,206.9 ± 229  | 38.9 ± 3.9    | 56.7 ± 0.6      | 100–110     |
| EL4           | Thymoma                   | 456.8 ± 30     | 10.5 ± 1      | 43.5 ± 1.21     | 30–33       |
| Wehi          | Pre-B lymphoma            | 495.0 ± 41     | 15.9 ± 3.3    | 32.7 ± 4.1      | 48–52       |
| P815          | Mastocytoma               | 184.7 ± 14     | 19.7 ± 1.5    | 9.4 ± 0.68      | 14–16       |
| SSCVII        | Squamous cell carcinoma   | 1020.4 ± 153   | 128.3 ± 28    | 7.8 ± 0.4       | 17–20       |
| 3T3           | Fibroblastoma             | 2,421 ± 91     | 32.6 ± 0.18   | 74.2 ± 2.41     | 100–110     |
| MCA205        | Fibrosarcoma              | 7,862.7 ± 856  | 252.5 ± 40    | 32.1 ± 2.5      | 39–43       |
| CT26          | colon carcinoma           | 2,361.1 ± 99.8 | 23.2 ± 1.65   | 103.0 ± 11.58   | 110–120     |
| B16           | Melanoma                  | 1,399.6 ± 55   | 6.8 ± 0.8     | 212.1 ± 23      | 250–350     |
| Human         |                           |                |               |                 |             |
| Human T cells | PBMC                      | 691.1 ± 54     | 61.3 ± 4.5    | 11.2 ± 0.3      | 10–12       |
| Jurkat        | T cell lymphoma           | 935.2 ± 63     | 3.8 ± 0.9     | 269.1 ± 24      | >400        |
| JM1           | B cell lymphoma           | 175.4 ± 4      | 1.6 ± 0.18    | 108.3 ± 9.4     | 270–290     |
| K562          | Chronic myeloid leukemia  | 888.5 ± 45     | 42.5 ± 4.4    | 21.4 ± 1.9      | 19–22       |
| 293           | Embryonic renal carcinoma | 8,220.6 ± 298  | 300.5 ± 38    | 28.0 ± 2.59     | 37–40       |
| Mel624        | Melanoma                  | 4,777.3 ± 159  | 140.6 ± 16    | 35.0 ± 3.6      | 38–42       |

Mouse and human cell lines (as indicated) were transduced at equivalent MOIs using VSV.G pseudotyped retrovirus. (Mouse T cells were transduced with ecotropic retrovirus). The table reports the observed signal intensity [photons per second per cell (p/s/c)], the fold difference in intensity and sensitivity for effLuc versus ffLuc. Note that the cell lines were not transduced to generate the highest possible signal intensities (i.e. higher MOIs or lentiviral substitution) and are thus not reflective of the highest obtainable with effLuc. Rather, v-ffLuc and v-effLuc were used at the same MOI (0.5) to facilitate intensity and sensitivity comparisons.
